# Supplementary material for: Hydrothermal-template synthesis and electrochemical properties of Co3O4/nitrogen-doped hemisphere-porous graphene composites with 3D heterogeneous structure
Source: Royal Society of Chemistry journal article supplement (doi:10.1039/d0ra06897g), 2020-01-01
Supplement: d0ra06897g1.pdf [file d0ra06897g1.pdf]

## Supporting information

### Hydrothermal-template synthesis and electrochemical properties of $\text{Co}_3\text{O}_4$ /nitrogen-doped hemisphere-porous graphene composites with 3D heterogeneous structure

Haiyang Fan<sup>a, b</sup>, Guiyun Yi<sup>a, b, \*</sup>, Qiming Tian<sup>a, b</sup>, Xiuxiu Zhang<sup>a, b</sup>, Baolin Xing<sup>b, c\*\*</sup>,

Chuanxiang Zhang<sup>a, b</sup>, Lunjian Chen<sup>a, b</sup>, Yulong Zhang<sup>a, b</sup>

<sup>a</sup> Henan Key Laboratory of Coal Green Conversion, College of Chemistry and Chemical Engineering,

Henan Polytechnic University, Jiaozuo 454003, China

<sup>b</sup> Collaborative Innovation Center of Coal Work Safety of Henan Province, Jiaozuo 454003, China

<sup>c</sup> Henan Province Industrial Technology Research Institute of Resources and Materials, Zhengzhou

University, Zhengzhou 454001, China

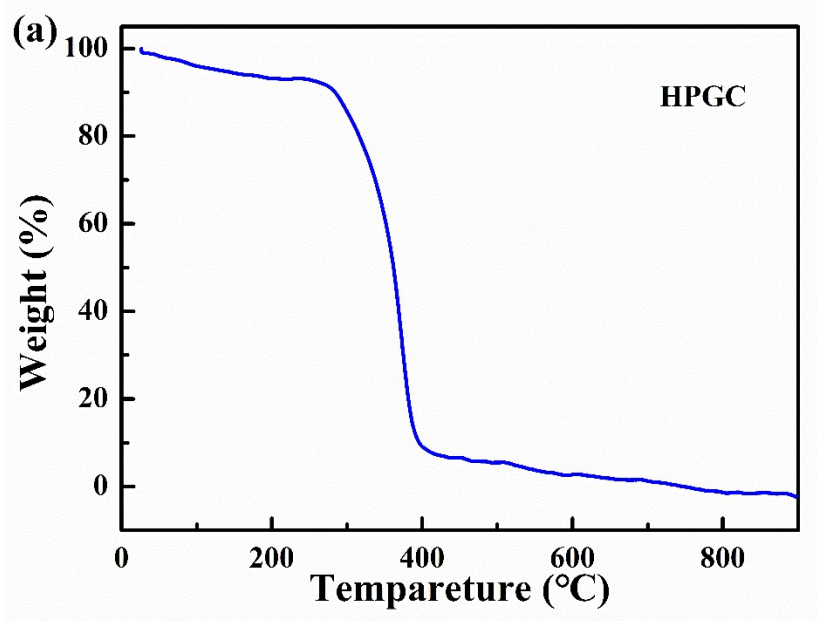

Figure S1. TGA curve of HPGC

\* Corresponding author. E-mail address: [ygyun@hpu.edu.cn](mailto:ygyun@hpu.edu.cn) (G. Yi).

\*\* Corresponding author. E-mail address: [baolinxing@hpu.edu.cn](mailto:baolinxing@hpu.edu.cn) (B. X.).

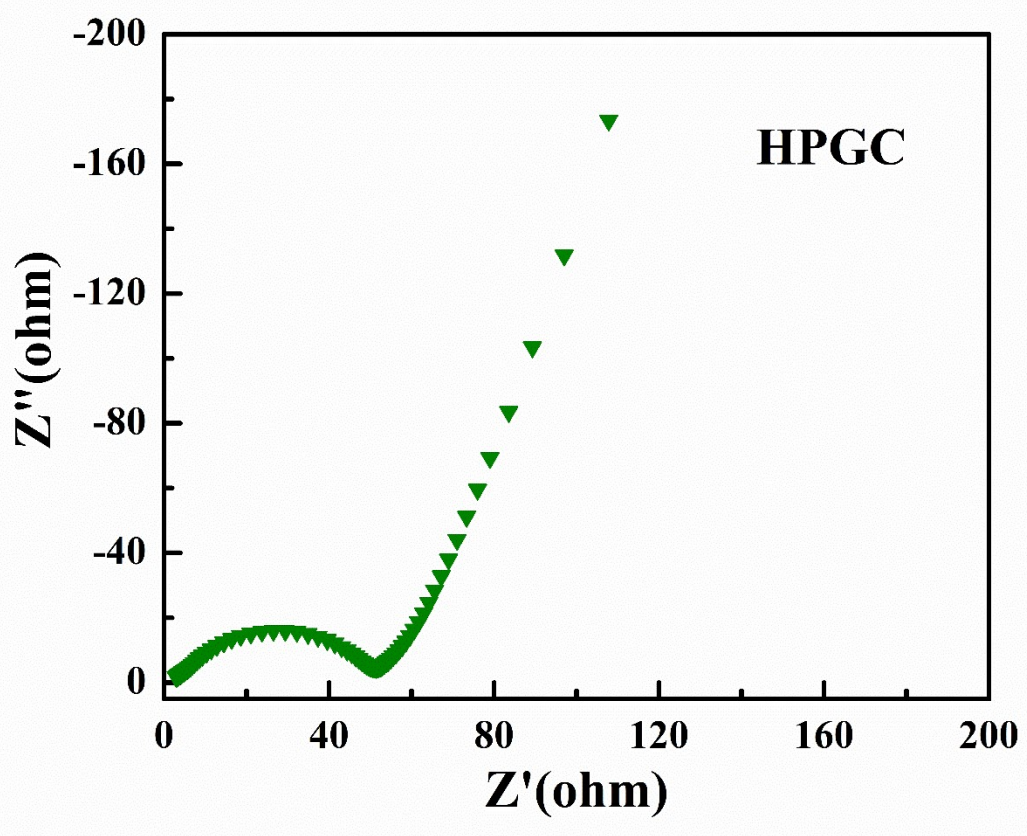

Figure S2. Nyquist plots of HPGC

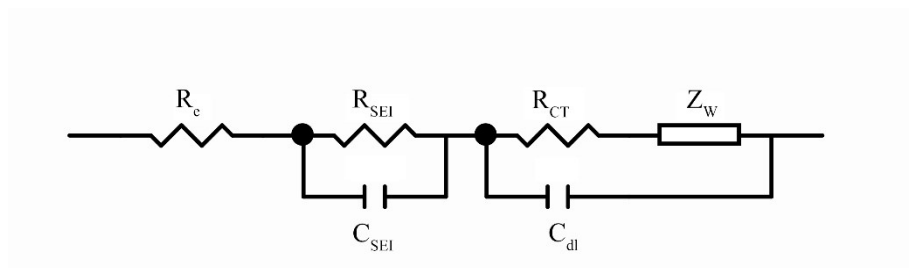

Figure S3. The equivalent circuit used for fitting impedance spectra
